# Supplementary material
Source: publisher figshare collection journal article supplement (https://frontiersin.figshare.com/ndownloader/files/12884675)
Supplement: Supplementary file [file 12884675]

*Supplementary Material*

***Sinorhizobium meliloti* RNase III: Catalytic features and impact on Symbiosis**

**Margarida Saramago, Marta Robledo, Rute G. Matos, José I. Jiménez-Zurdo\* and Cecilia M. Arraiano\***

\*Correspondence:

[cecilia@itqb.unl.pt](mailto:cecilia@itqb.unl.pt)

[jjz@eez.csic.es](mailto:jjz@eez.csic.es)

## 1.1 Supplementary Figures

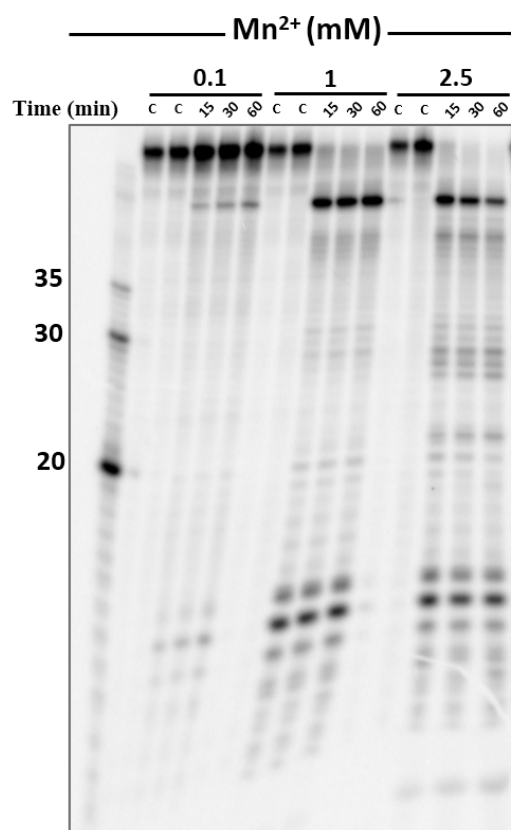

**Supplementary Figure S1.** 500 nM of purified *SmRNase III* was incubated with 0.6 pmol of R1.1 RNA at 37°C in a reaction buffer containing 0.1, 1 or 2.5 mM of  $MnCl_2$ . “C” corresponds to control reactions without the enzyme. Incubation times are indicated on top of the panel. Reactions were analyzed on 7 M urea/15% polyacrylamide gels. 5'-end labelled transcripts of known sizes (35, 30 and 20 bases) were included as molecular-weight size marker.

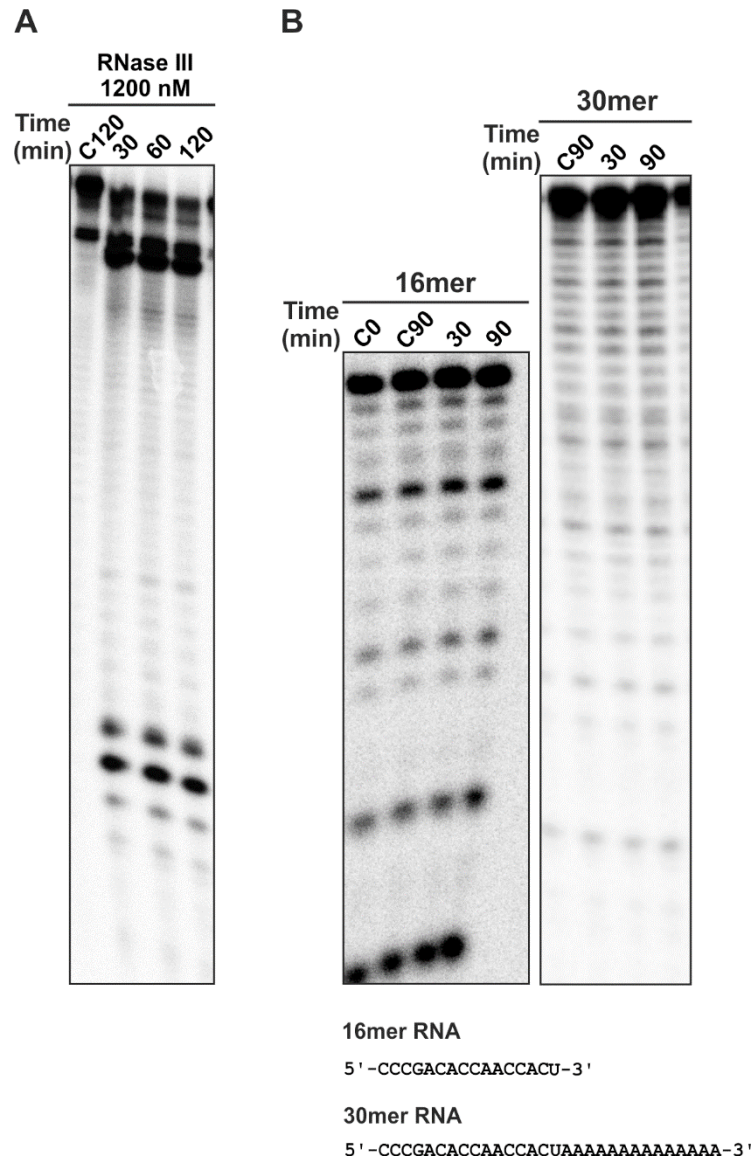

**Supplementary Figure S2.** (A) *SmRNase III* (1,200 nM) activity on R1.1 RNA (0.2 pmol). The reaction mix was incubated in the presence of 10 mM MgCl<sub>2</sub>. “C” corresponds to control reactions without the enzyme. Incubation times are indicated on top of the panels. Reactions were analyzed on 7 M urea/15% polyacrylamide gels. (B) Activity of *SmRNase III* (500 nM) on ssRNA (0.1 pmol of 16mer or 30mer oligonucleotide). Sequence of the RNA substrates are indicated on bottom of the panels. “C” corresponds to control reactions without the enzyme. Incubation times are indicated on top of the panels. Reaction products were analyzed on 7 M urea/20% polyacrylamide gels. This experiment was performed at least in triplicate.

## 1.2 Supplementary Tables

**Table S1.** Bacterial strains and plasmids used in this study

| Strain/Plasmid                     | Relevant characteristics                                                                                                                                                                | Reference/Source           |
|------------------------------------|-----------------------------------------------------------------------------------------------------------------------------------------------------------------------------------------|----------------------------|
| <b><u>Bacteria</u></b>             |                                                                                                                                                                                         |                            |
| <i>S. meliloti</i>                 |                                                                                                                                                                                         |                            |
| <b>Sm2011</b>                      | Wild-type SU47 derivative derivative; Sm <sup>r</sup>                                                                                                                                   | (Casse et al., 1979)       |
| <b>SmΔ<i>rnc</i></b>               | Sm2011 RNase III mutant                                                                                                                                                                 | This work                  |
| <i>E. coli</i>                     |                                                                                                                                                                                         |                            |
| <b>BL21(DE3) <i>recA</i>rnc105</b> | <i>recA</i> ::Tn9Δ <i>rnc</i> 105; Cm <sup>r</sup>                                                                                                                                      | (Amarasinghe et al., 2001) |
| <b>DH5α</b>                        | F <sup>-</sup> <i>endA1 glnV44 thi-1 recA1 relA1 gyrA96 deoR nupG purB20 φ80dlacZΔM15 Δ(lacZYA-argF)U169, hsdR17(r<sub>K</sub><sup>-</sup>m<sub>K</sub><sup>+</sup>), λ<sup>-</sup></i> | Invitrogen                 |
| <b>S17-1</b>                       | <i>recA pro hsdR RP4-2-Tc::Mu-Km::Tn7</i>                                                                                                                                               | (Simon et al., 1983)       |
| <b><u>Plasmids</u></b>             |                                                                                                                                                                                         |                            |
| <b>pET15b</b>                      | Commercial expression vector; Ap <sup>r</sup>                                                                                                                                           | Novagen                    |
| <b>pET15b-<i>SmRNC</i></b>         | Encodes His- <i>SmRNase III</i> ; Ap <sup>r</sup>                                                                                                                                       | This work                  |
| <b>pET15b-<i>SmE125A</i></b>       | Encodes His- <i>SmRNase III_E125A</i> mutant; Ap <sup>r</sup>                                                                                                                           | This work                  |
| <b>pET15b-<i>SmE125Q</i></b>       | Encodes His- <i>SmRNase III_E125Q</i> mutant; Ap <sup>r</sup>                                                                                                                           | This work                  |
| <b>pK18<i>mobsacB</i></b>          | Suicide plasmid in <i>S. meliloti</i> , <i>sacB</i> , <i>oriV</i> , Km <sup>r</sup>                                                                                                     | (Schafer et al., 1994)     |
| <b>pKrcnKO</b>                     | Suicide plasmid for <i>rnc</i> deletion; Km <sup>r</sup>                                                                                                                                | This work                  |
| <b>pSRKKm</b>                      | Broad-host-range expression vector; Km <sup>r</sup>                                                                                                                                     | (Khan et al., 2008)        |
| <b>pSRKrcn</b>                     | pSRKKm derivative encoding <i>SmRNase III</i> ; Km <sup>r</sup>                                                                                                                         | This work                  |

Sm<sup>r</sup>, streptomycin resistance; Cm<sup>r</sup>, chloramphenicol resistance; Ap<sup>r</sup>, ampicillin resistance; Km<sup>r</sup>, kanamycin resistance

**Table S2.** Oligonucleotides used in this study

| Name           | Sequence (5'-3')                                                                      | Restriction site |
|----------------|---------------------------------------------------------------------------------------|------------------|
| tRNASerT7FW    | GTTTTTTTTTAATACGACTCACTATAGGGACAGGTG<br>GCCGAGTGG                                     | -                |
| tRNASerREV     | TGGCGGACAGGGTGGGATTC                                                                  | -                |
| T7FW           | TAATACGACTCACTATA                                                                     | -                |
| R1.1REV        | AAGAAGGTCAATCATAAAGGCCACTCTTGCGAATG<br>ACCTTGAGTTTGTCCCTCTACTCCCTATAGTGAGTC<br>GTATTA | -                |
| 30mer          | CCCGACACCAACCACUAAAAAAAAAAAAAAAA                                                      | -                |
| 30mer comp     | UUUUUUUUUUUUUAGUGGUUGGUGUCGGG                                                         | -                |
| 16mer          | CCCGACACCAACCACU                                                                      | -                |
| 16mer comp     | AGUGGUUGGUGUCGGG                                                                      | -                |
| RNC_F          | GTCGTCC <u>C</u> ATATGAAGGGCCGC                                                       | <i>NdeI</i>      |
| RNC_R          | GTCATGGGATCCGTCAATTTCCGG                                                              | <i>BamHI</i>     |
| E125A_F        | GAATGTGCGaGCCGATGTGGTAGcGTCGCTGATC                                                    | -                |
| E125A_R        | GATCAGCGACgCTACCACATCGGcCGCACATTC                                                     | -                |
| E125Q_F        | GAATGTGCGaGCCGATGTGGTAcAGTCGCTGATC                                                    | -                |
| E125Q_R        | GATCAGCGACTgTACCACATCGGcCGCACATTC                                                     | -                |
| 1rncKOSacI_F   | GCTAGAGCT <u>C</u> GCAGGATGACAAGGAAGACTG                                              | <i>SacI</i>      |
| 2rncKOBamHI_R  | AGTCGGATCCTCAGTGGACGACCTTGAACA                                                        | <i>BamHI</i>     |
| 3rncKOBamHI_F  | ATGCGGATCCTTGACGGATATCATGACGGAC                                                       | <i>BamHI</i>     |
| 4rncKOPstI_R   | ATATCTGCAGCGAGATCGCCTTGATCGCCTCG                                                      | <i>PstI</i>      |
| rncOEI_NdeI_F  | GCCACATATGATGAAGGGCCGCTCGTTGAA                                                        | <i>NdeI</i>      |
| rncOEI_BamHI_R | TCTCGGATCCCGATTGACCAGTGTGCGACTTGC                                                     | <i>BamHI</i>     |

Restriction sites are underlined and base changes with respect to the wild-type sequence are in small letters
